# Supplementary material
Source: PubMed Central journal article supplement (PMC3105376)
Supplement: NIHMS296860-supplement-Tables_1_and_2.pdf [file NIHMS296860-supplement-Tables_1_and_2.pdf]

**Supplemental Table 1. Regional Brain Volumes**

Not adjusted for ICV. Adjusting for ICV, all tests remained non-significant.

| Volume (mm <sup>3</sup> ) | Control (n=26) |      | High Risk (n=26) |      | F-Test for difference |      |         |
|---------------------------|----------------|------|------------------|------|-----------------------|------|---------|
|                           | LS mean        | SE   | LS mean          | SE   | F-value               | DF   | P value |
| <b>Prefrontal GM</b>      | 29,843         | 1196 | 30,539           | 1196 | 0.299                 | 1,25 | 0.5893  |
| <b>Prefrontal WM</b>      | 25,324         | 773  | 24,981           | 773  | 0.095                 | 1,25 | 0.7608  |
| <b>Frontal GM</b>         | 45,188         | 1289 | 46,512           | 1289 | 1.262                 | 1,25 | 0.2719  |
| <b>Frontal WM</b>         | 37,916         | 994  | 38,750           | 994  | 0.516                 | 1,25 | 0.4793  |
| <b>Parietal GM</b>        | 61,639         | 1729 | 64,180           | 1729 | 2.647                 | 1,25 | 0.1163  |
| <b>Parietal WM</b>        | 49,215         | 1378 | 50,721           | 1378 | 1.749                 | 1,25 | 0.1980  |
| <b>Occipital GM</b>       | 69,487         | 2406 | 71,263           | 2406 | 0.694                 | 1,25 | 0.4126  |
| <b>Occipital WM</b>       | 41,863         | 1356 | 42,734           | 1356 | 0.402                 | 1,25 | 0.5318  |

Abbreviations: GM: gray matter, WM: white matter.

**Supplemental Table 2. Neonatal Brain Volumes by Gender – Adjusted for ICV**

|                           | Males          |       |                  |       | F-Test for difference |      |         |
|---------------------------|----------------|-------|------------------|-------|-----------------------|------|---------|
| Volume (mm <sup>3</sup> ) | Control (n=12) |       | High Risk (n=12) |       |                       |      |         |
|                           | LS mean        | SE    | LS mean          | SE    | F-value               | DF   | P value |
| <b>Total GM</b>           | 271,096        | 4,389 | 268,484          | 4,389 | 0.367                 | 1,10 | 0.5602  |
| <b>Total umWM</b>         | 169,727        | 4,635 | 170,703          | 4,635 | 0.032                 | 1,10 | 0.8622  |
| <b>Total mWM</b>          | 9,036          | 1,287 | 8,994            | 1,287 | 0.001                 | 1,10 | 0.9797  |
| <b>Total CSF</b>          | 64,991         | 2,496 | 68,035           | 2,496 | 0.860                 | 1,10 | 0.3712  |
| <b>Lateral Ventricle</b>  | 4,538          | 384   | 4,986            | 384   | 0.933                 | 1,10 | 0.3524  |
| <b>Cortical GM</b>        | 224,511        | 2,990 | 221,822          | 2,990 | 0.789                 | 1,10 | 0.3952  |
| <b>Cortical WM</b>        | 165,213        | 2,684 | 162,492          | 2,684 | 0.494                 | 1,10 | 0.4897  |
| <b>Cerebellum</b>         | 28,052         | 1,142 | 26,968           | 1,142 | 0.741                 | 1,10 | 0.4063  |
|                           | Females        |       |                  |       | F-Test for difference |      |         |
|                           | Control (n=14) |       | High Risk (n=14) |       |                       |      |         |
|                           | LS mean        | SE    | LS mean          | SE    | F-value               | DF   | P value |
| <b>Total GM</b>           | 239,984        | 2,076 | 238,592          | 2,076 | 0.405                 | 1,12 | 0.5357  |
| <b>Total umWM</b>         | 159,682        | 1,244 | 158,545          | 1,244 | 0.656                 | 1,12 | 0.4332  |
| <b>Total mWM</b>          | 9,570          | 1,258 | 10,179           | 1,258 | 0.158                 | 1,12 | 0.6975  |
| <b>Total CSF</b>          | 57,867         | 2,252 | 59,783           | 2,252 | 0.616                 | 1,12 | 0.4469  |
| <b>Lateral Ventricle</b>  | 4,098          | 404   | 4,116            | 404   | 0.002                 | 1,12 | 0.9680  |
| <b>Cortical GM</b>        | 198,285        | 2,056 | 196,639          | 2,056 | 0.482                 | 1,12 | 0.5002  |
| <b>Cortical WM</b>        | 149,599        | 1,293 | 148,018          | 1,293 | 1.163                 | 1,12 | 0.3008  |
| <b>Cerebellum</b>         | 24,208         | 752   | 23,938           | 752   | 0.130                 | 1,12 | 0.7249  |

Abbreviations: ICV: intracranial volume; GM: gray matter; umWM: unmyelinated white matter; mWM: myelinated white matter.
